# Supplementary material for: Risk of psychiatric disorders among the surviving twins after a co-twin loss
Source: eLife. 2020 Jul 14;9:e56860. doi: 10.7554/eLife.56860 (PMC7360364; doi:10.7554/eLife.56860)
Supplement: Figure 2—source data 1. [file elife-56860-fig2-data1.xls]

## Sheet: Sheet1
age	HR	SE	HRL	HRU
2	2.02774	0.203088	1.36189	3.01912
3	2.0291	0.195483	1.38327	2.97645
4	2.03046	0.187966	1.40474	2.93488
5	2.03182	0.180546	1.42627	2.89445
6	2.03318	0.173237	1.44782	2.85519
7	2.03454	0.166052	1.46934	2.81715
8	2.0359	0.15901	1.49076	2.7804
9	2.03727	0.152129	1.51201	2.74499
10	2.03863	0.145433	1.53301	2.71101
11	2.04	0.138948	1.55366	2.67857
12	2.04136	0.132705	1.57384	2.64776
13	2.04273	0.126741	1.59342	2.61874
14	2.0441	0.121095	1.61223	2.59166
15	2.04547	0.115815	1.63009	2.5667
16	2.04684	0.110953	1.6468	2.54406
17	2.04821	0.106567	1.66213	2.52397
18	2.04958	0.102716	1.67584	2.50668
19	2.05094	0.0994645	1.68768	2.4924
20	2.05221	0.0968665	1.69734	2.48127
21	2.05329	0.094959	1.7046	2.47332
22	2.0541	0.093754	1.7093	2.46846
23	2.05455	0.0932352	1.71141	2.46648
24	2.05453	0.093359	1.71098	2.46706
25	2.05396	0.0940567	1.70817	2.46976
26	2.05276	0.0952406	1.70321	2.47404
27	2.05082	0.0968103	1.69637	2.47931
28	2.04805	0.0986592	1.68796	2.48496
29	2.04438	0.10068	1.67827	2.49035
30	2.03971	0.102769	1.6676	2.49486
31	2.03396	0.104828	1.6562	2.49789
32	2.02705	0.106766	1.64432	2.49888
33	2.0189	0.108502	1.63214	2.49731
34	2.00944	0.109961	1.61985	2.49272
35	1.99859	0.111077	1.60759	2.48469
36	1.98629	0.111795	1.59545	2.47288
37	1.97248	0.112065	1.58351	2.45699
38	1.9571	0.111851	1.57183	2.43681
39	1.94011	0.111124	1.56041	2.41221
40	1.92146	0.109869	1.54921	2.38316
41	1.90113	0.108087	1.53818	2.34971
42	1.87907	0.105801	1.52716	2.31207
43	1.85528	0.103058	1.51596	2.27056
44	1.82975	0.0999425	1.50425	2.22568
45	1.80248	0.0965901	1.4916	2.17815
46	1.77347	0.0932017	1.47737	2.1289
47	1.74274	0.0900651	1.46073	2.0792
48	1.71033	0.0875722	1.44058	2.03059
49	1.67628	0.0862209	1.41565	1.98489
50	1.6408	0.0865462	1.3848	1.94412
51	1.6048	0.088783	1.3485	1.90983
52	1.56928	0.0926552	1.30868	1.88178
53	1.53516	0.0974769	1.26818	1.85834
54	1.50325	0.102356	1.23	1.83721
55	1.47434	0.10638	1.19687	1.81614
56	1.44913	0.108735	1.17098	1.79334
57	1.42829	0.108802	1.154	1.76778
58	1.41249	0.106279	1.14689	1.73961
59	1.4024	0.101446	1.14953	1.71089
60	1.39826	0.0958559	1.15876	1.68725
61	1.39851	0.0927662	1.16601	1.67736
62	1.40118	0.0947491	1.16371	1.68712
63	1.40433	0.101856	1.15019	1.71462
64	1.40596	0.111718	1.12948	1.75012
65	1.4041	0.121102	1.10743	1.78024
66	1.39679	0.127083	1.08883	1.79187
67	1.38265	0.127954	1.07596	1.77675
68	1.36222	0.124727	1.06679	1.73946
69	1.33657	0.119989	1.05647	1.69093
70	1.30678	0.117448	1.03808	1.64503
71	1.2739	0.121282	1.00439	1.61574
72	1.23893	0.134328	0.952155	1.61209
73	1.2028	0.156645	0.884822	1.63504
74	1.16634	0.186251	0.809634	1.68021
75	1.13033	0.220688	0.8	1.74202
76	1.09532	0.257906	0.8	1.81581
77	1.06139	0.296803	0.8	1.89895
78	1.02851	0.336798	0.8	1.99018
79	0.996655	0.377542	0.8	2.08886
80	0.965784	0.418816	0.8	2.19471
81	0.93587	0.460478	0.8	2.30768
